# Supplementary material for: The Endocranial Anatomy of Therizinosauria and Its Implications for Sensory and Cognitive Function
Source: PubMed Central journal article supplement (PMC3526574; doi:10.1371/journal.pone.0052289), 2012-12-19
Supplement: pone.0052289.s004.pdf [file pone.0052289.s004.pdf]

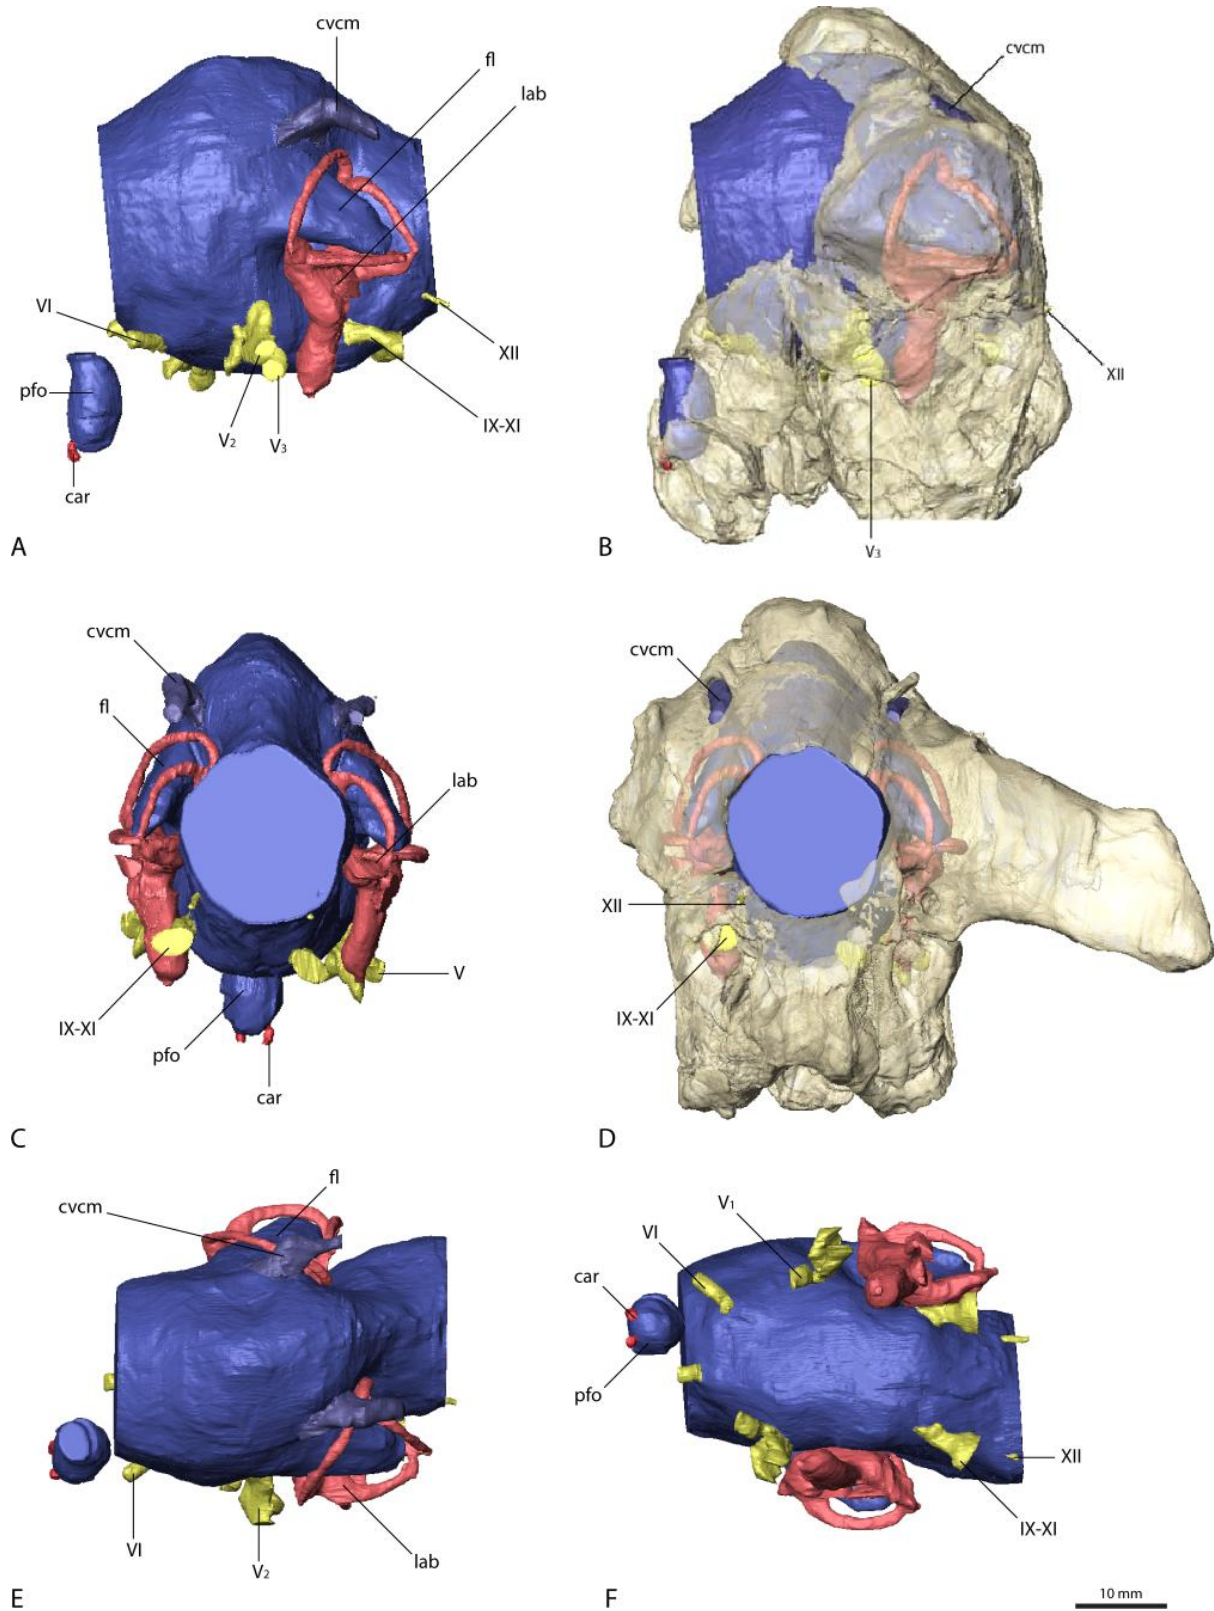

**Figure S4. Cranial endocast and braincase of *Falcarius utahensis* (referred specimen, UMNH VP 15001).** In (A) and (B) in left lateral, (C) and (D) in caudal, (E) dorsal, and (F) ventral view. Bone in (B) and (D) rendered transparent. Abbreviations: car, cerebral carotid artery canal; cvcm, caudal

middle cerebral vein; fl, floccular lobe; lab, endosseous labyrinth; pfo, pituitary (hypophyseal) fossa; V<sub>1</sub>, ophthalmic branch of the trigeminal nerve canal; V<sub>2</sub>, maxillary branch of the trigeminal nerve canal; V<sub>3</sub>, mandibular branch of the trigeminal nerve canal; VI, abducens nerve canal; IX-XI, shared canal for the glossopharyngeal, vagus and spinal accessory nerve; XII, hypoglossal nerve canal. 3D content can be activated by clicking on figure S4 B.
